# Supplementary material for: GLP-1 Receptor Agonist Treatment in Morbid Obesity and Type 2 Diabetes Due to Pathogenic Homozygous Melanocortin-4 Receptor Mutation: A Case Report
Source: PubMed Central journal article supplement — Cell Rep Med. 2020 Apr 21;1(1):100006. doi: 10.1016/j.xcrm.2020.100006 (PMC7659505; doi:10.1016/j.xcrm.2020.100006), 2020-04-21
Supplement: mmc1.pdf [file mmc1.pdf]

**Cell Reports Medicine, Volume 1**

**Supplemental Information**

**GLP-1 Receptor Agonist Treatment in Morbid Obesity  
and Type 2 Diabetes Due to Pathogenic Homozygous  
Melanocortin-4 Receptor Mutation: A Case Report**

**Eva W. Iepsen, Christian T. Have, Simon Veedfald, Sten Madsbad, Jens J. Holst, Niels Grarup, Oluf Pedersen, Ivan Brandslund, Jens-Christian Holm, Torben Hansen, and Signe S. Torekov**

| <b>Drug</b>         | <b>Dose</b>     | <b>Indication</b>     |
|---------------------|-----------------|-----------------------|
| Metformin           | 1g x 2 daily    | Type 2 diabetes       |
| Simvastatin         | 80mg x 1 daily  | Hypercholesterolaemia |
| Aspirin             | 75mg x 1 daily  | Thrombosis prevention |
| Potassium chloride  | 750mg x 1 daily | Hypertension          |
| Lansoprazole        | 60mg x 1 daily  | Gastric ulcer         |
| Prednisolone        | 10mg x daily    | Rheumatic disease     |
| Cellcept            | 1g x 2 daily    | Rheumatic disease     |
| Plaquenil           | 200mg x 1 daily | Rheumatic disease     |
| Tramadol Retard     | 100mg x 2 daily | Ankle pain            |
| Paracetamol         | 665mg x 3 daily | Ankle pain            |
| Truxal              | 100mg x 1 daily | Anxiety disorder      |
| Duloxetine          | 60mg x 1 daily  | Anxiety disorder      |
| Tolterodin          | 4mg x 1 daily   | Incontinence          |
| Vitamin supplements | 800mg x 1 daily | Malabsorption         |

**Supplementary Information (SI) Table 1.** Drug list for a woman with a homozygous *MC4R* mutation and severe obesity. Related to **Figure 1** and **Table 1**.
